# Supplementary material for: Electrochemical generation of palladium volatile species enhanced with Sn(ii): application for detection of Pd(ii) by pyrolytic graphite-coated furnace atomic absorption spectrometry
Source: Royal Society of Chemistry journal article supplement (doi:10.1039/c8ja00406d), 2019-01-01

## Supporting Information

**Electrochemical Generation of Palladium Volatile Species Enhanced with Sn(II):**

**Application for Detection of Pd(II) by Pyrolytic Graphite-Coated Furnace Atomic**

**Absorption Spectrometry**

Alireza Shams<sup>a</sup>, Narges Ashraf<sup>\*,a</sup>, Mohammad Hossein Arbab-Zavar<sup>a</sup>, Mahboobeh Masrournia<sup>b</sup>

<sup>a</sup> *Department of Chemistry, Faculty of Science, Ferdowsi University of Mashhad, Mashhad, Iran*

<sup>b</sup> *Department of Chemistry, Mashhad Branch, Islamic Azad University, Mashhad, Iran*

*\* Corresponding author: ashraf-n@um.ac.ir*

Table S-1: Graphite furnace temperature program applied for modification of graphite tube.

| <b>Step</b>        | <b>Start temp. (°C)</b> | <b>End temp. (°C)</b> | <b>Ramp time (s)</b> | <b>Hold time (s)</b> | <b>Ar flow rate (mL/min)</b> |
|--------------------|-------------------------|-----------------------|----------------------|----------------------|------------------------------|
| <b>Drying</b>      | 80                      | 140                   | 10                   | 5                    | 200                          |
| <b>Ashing</b>      | 400                     | 700                   | 10                   | 5                    | 200                          |
| <b>Atomization</b> | 1400                    | 1400                  | 0                    | 5                    | 0                            |
| <b>Cooling</b>     | 0                       | 0                     | 0                    | 10                   | 200                          |

Fig. S-1†

EDX profile of PdVS trapped on a carbon/formvar coated copper grid during the ECVG system, (Pd(II): 5 mgL<sup>-1</sup>, with Sn(II) (5mg L<sup>-1</sup>) in Cell). All the conditions for ECVG system were set at the optimum values.

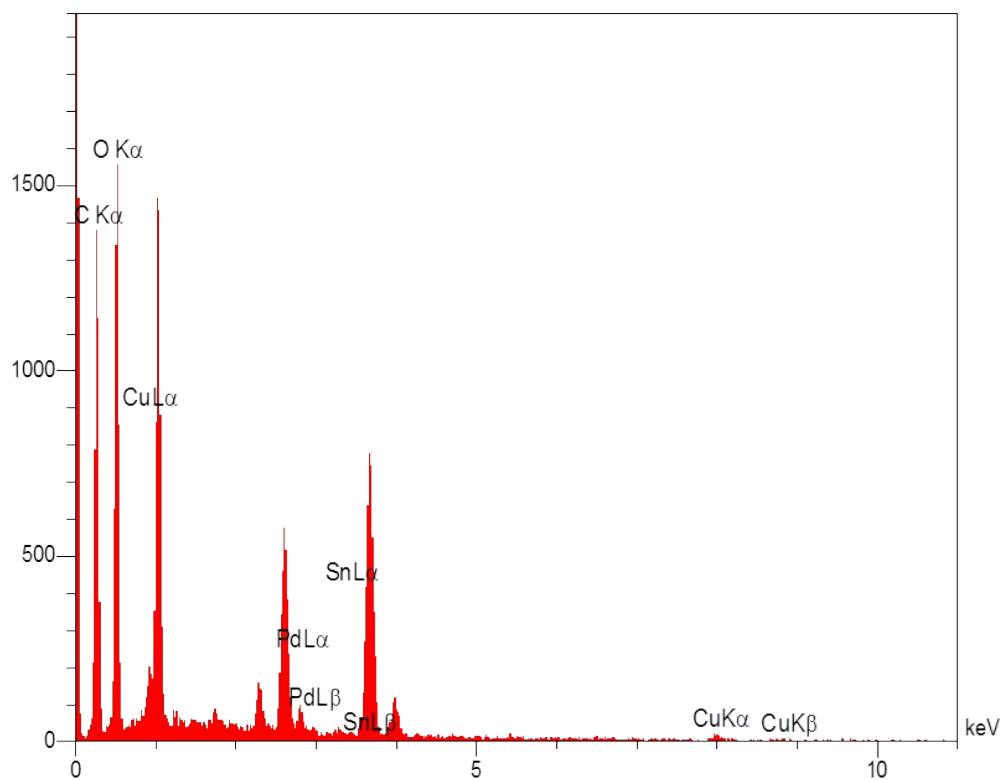

Fig. S-2†

The absorbance vs. time plots. The ECVG cell was coupled to the quartz tube atomizer (in the absence of the flame). Pd(II):  $5 \text{ mgL}^{-1}$  and all the conditions for ECVG system were set at the optimum values.

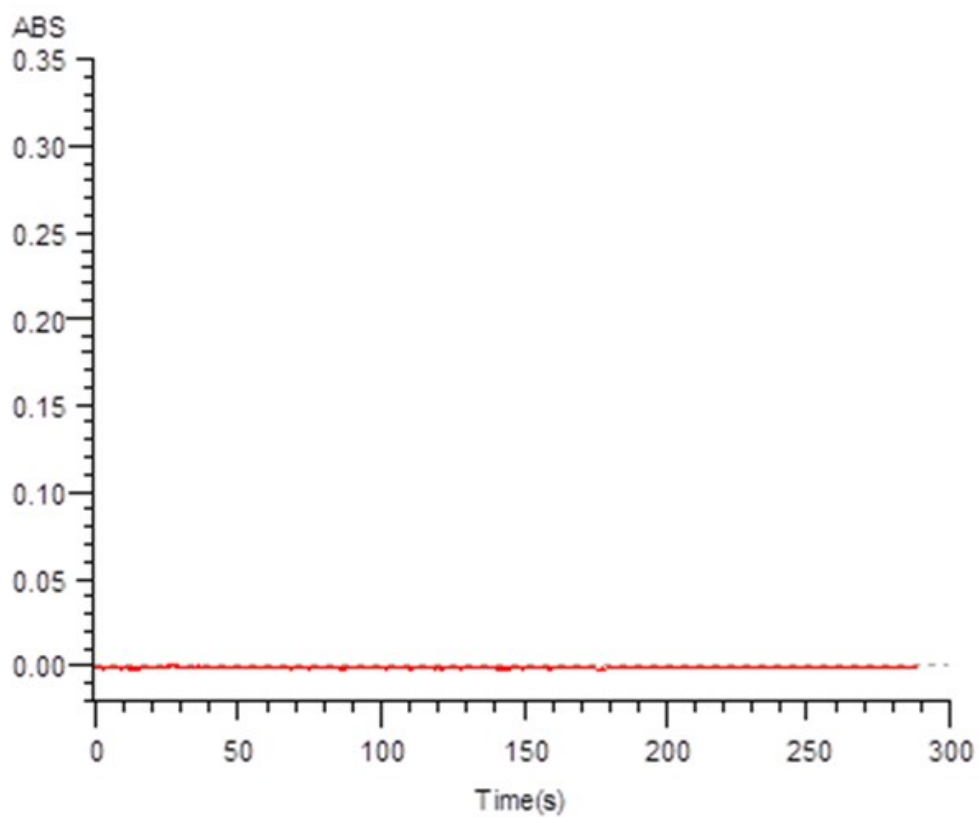

Fig. S-3†

Effects of different modifiers on the absorbance peak height of palladium. (Pd(II): 500 ng L<sup>-1</sup>; Trapping temperature: 400°C, Catholyte: 0.005 mol L<sup>-1</sup>). All other conditions for ECVG-GFAAS were set at the optimum values.

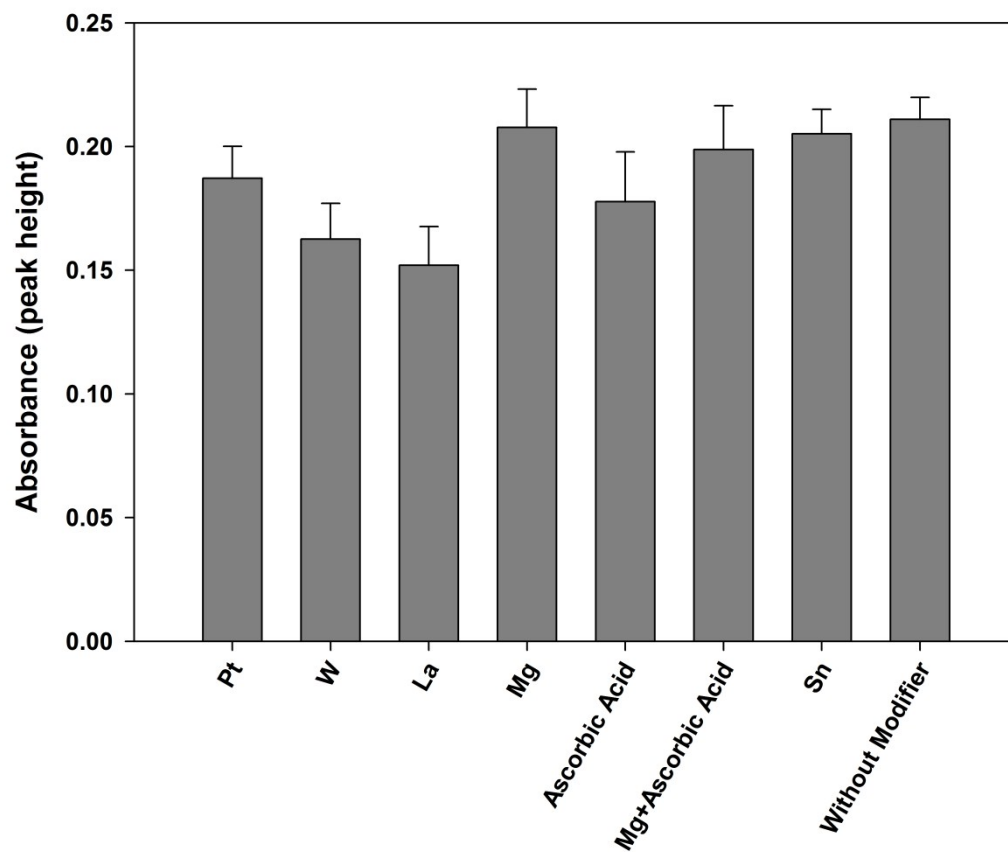

Fig. S-4†

EDX profile (surface of W-TIG welding electrode)

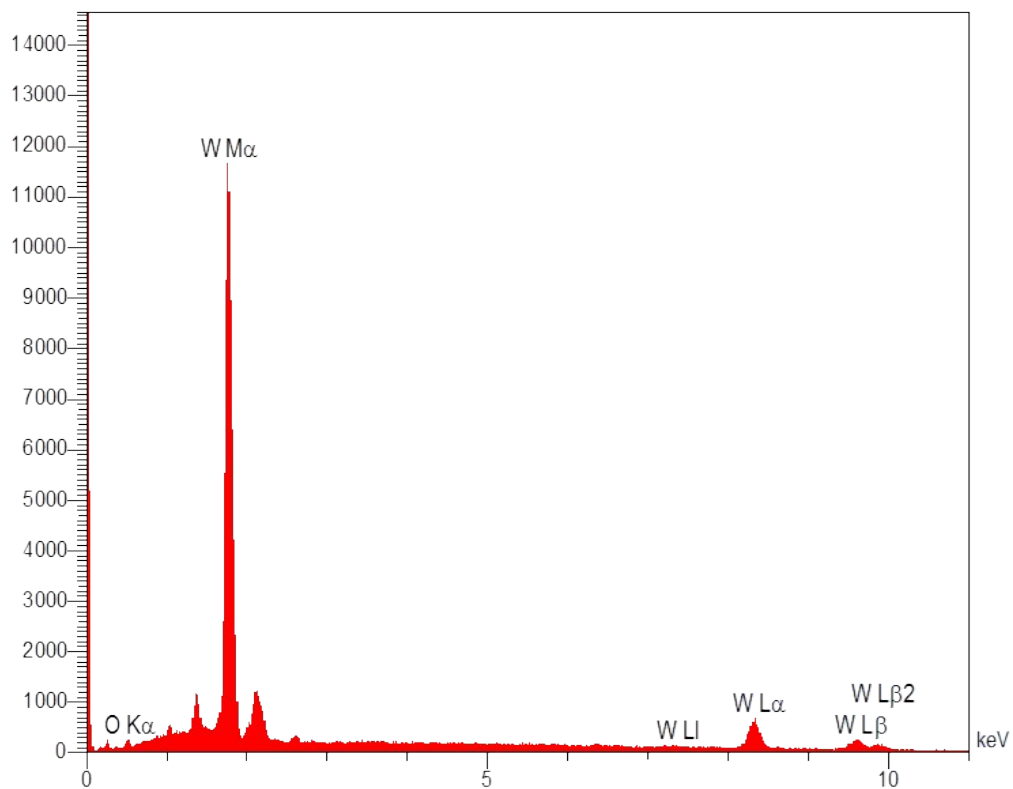

| Elt | Line | Int   | Error   | K      | Kr     | W%     | A%     | Class |
|-----|------|-------|---------|--------|--------|--------|--------|-------|
| O   | Ka   | 10.4  | 43.6722 | 0.0150 | 0.0138 | 5.97   | 42.18  | A     |
| W   | La   | 141.4 | 2.7283  | 0.9850 | 0.9086 | 94.03  | 57.82  | A     |
|     |      |       |         | 1.0000 | 0.9224 | 100.00 | 100.00 |       |

Fig. S-5†

Effects of different catholyte solutions on the absorbance peak height of palladium. (Pd(II): 500 ng L<sup>-1</sup>; Trapping temperature: 400°C, Catholyte: 0.005 mol L<sup>-1</sup>). All other conditions for ECVG-GFAAS were set at the optimum values.

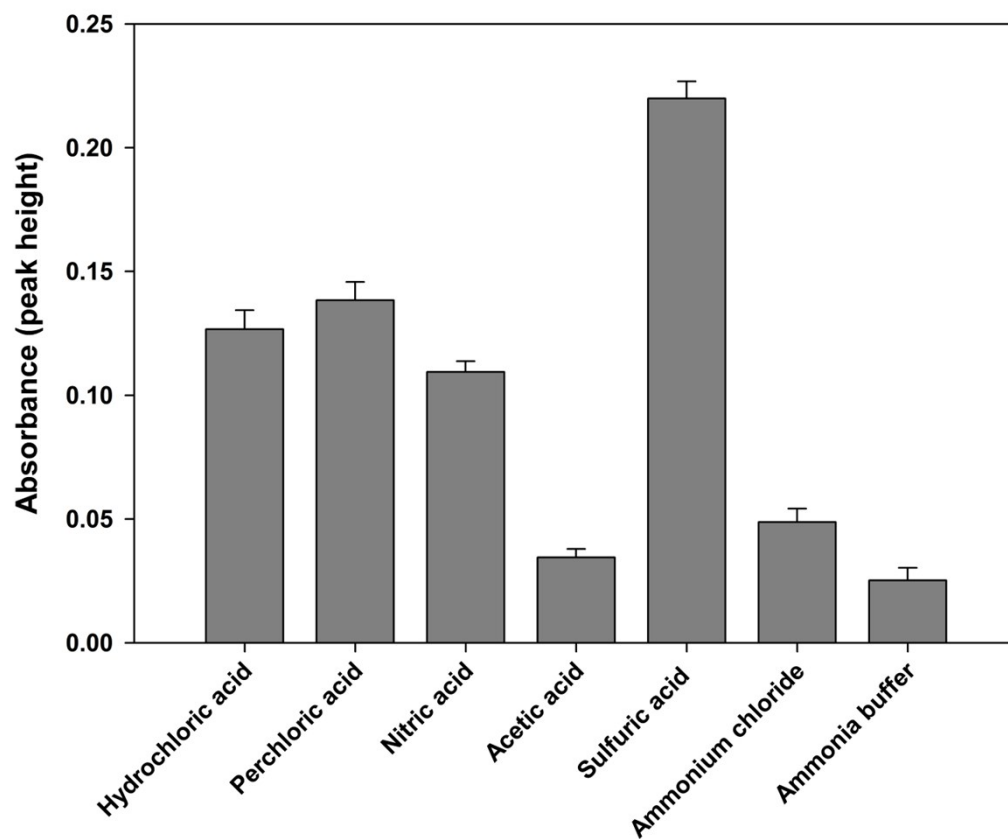

Fig. S-6†

Effect of the presence of Sn(II) ( $5 \text{ mg L}^{-1}$ , as enhancement reagent) in the ECVG cell (Pd(II):  $50 \text{ ng L}^{-1}$ ). All the conditions for ECVG-GFAAS were set at the optimum values.

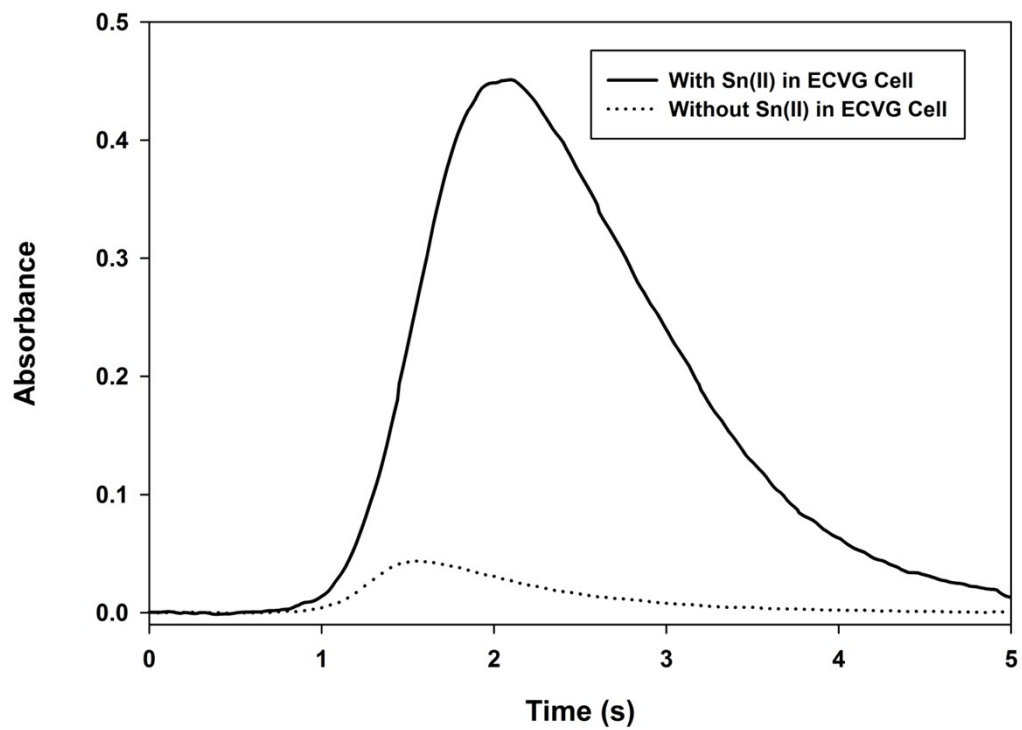



Fig. S-7†

The absorbance vs. time plots obtained by applying Pb HCL, Sn HCL. (Blank solution). All the conditions for ECVG-GFAAS were set at the optimum values.

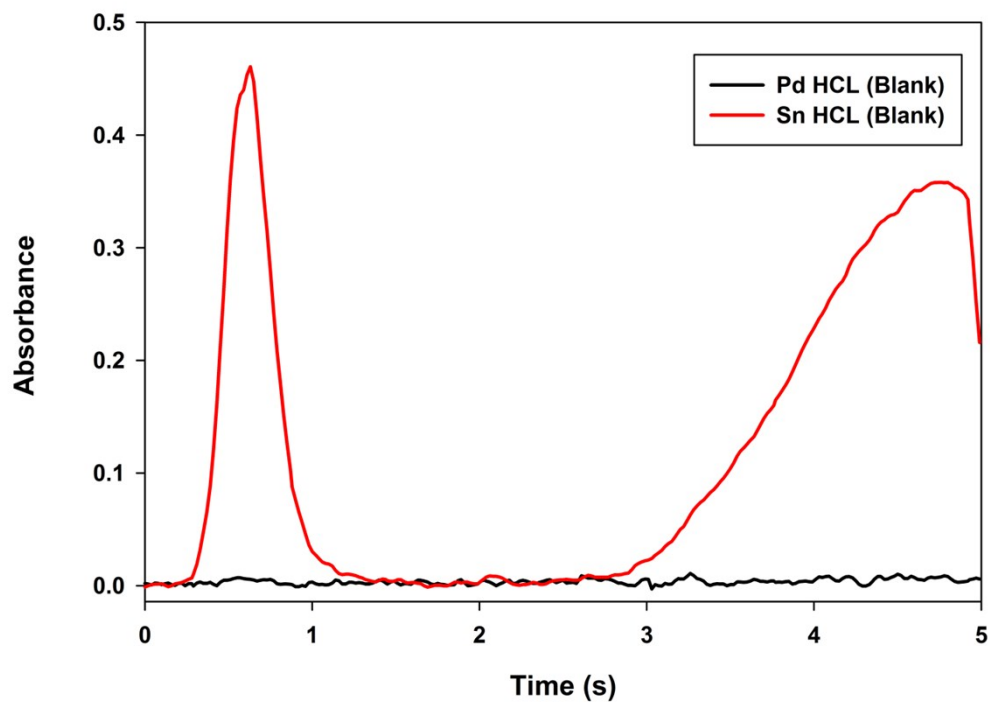

Fig. S-8†

Dependence of the absorbance signal vs. time during ECVG-FAAS (Pd(II): 50 mg L<sup>-1</sup>); All the conditions for ECVG were set at the optimum values.

a) With Sn(II) (5 mg L<sup>-1</sup>) in the ECVG cell

b) Without Sn(II) in the ECVG Cell

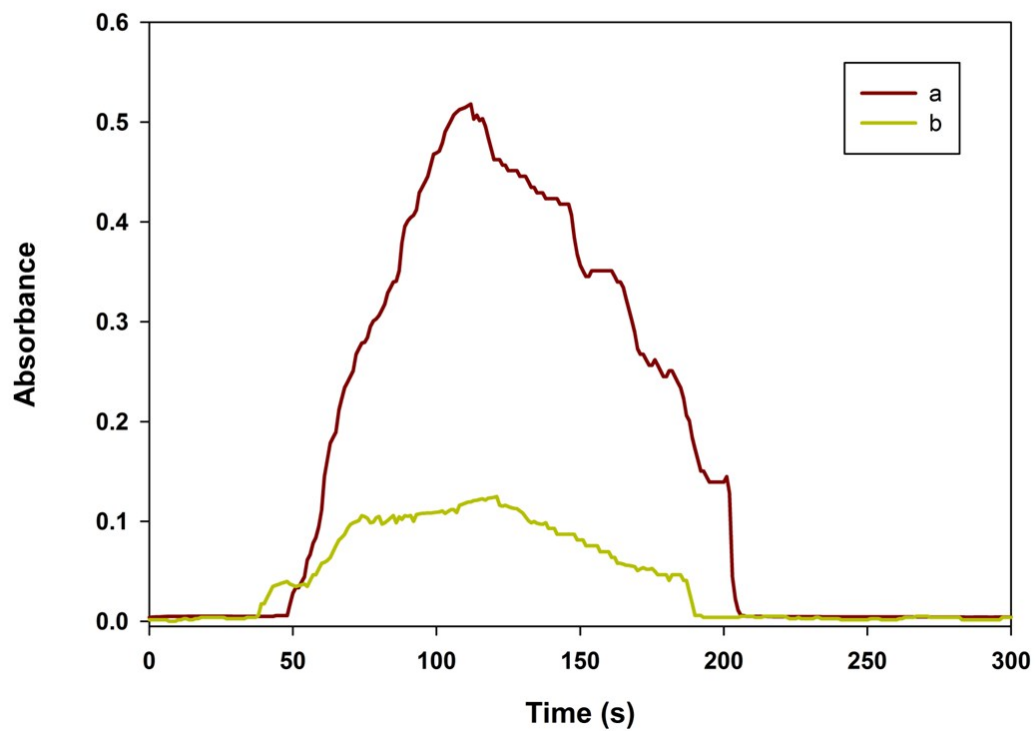

Fig. S-9†

The statistical evaluation of the obtained results using the Pareto chart with a minimum t-value of 3.18 at a confidence level of 95.0%. Concentration of Pd(II) 500 ng L<sup>-1</sup>.

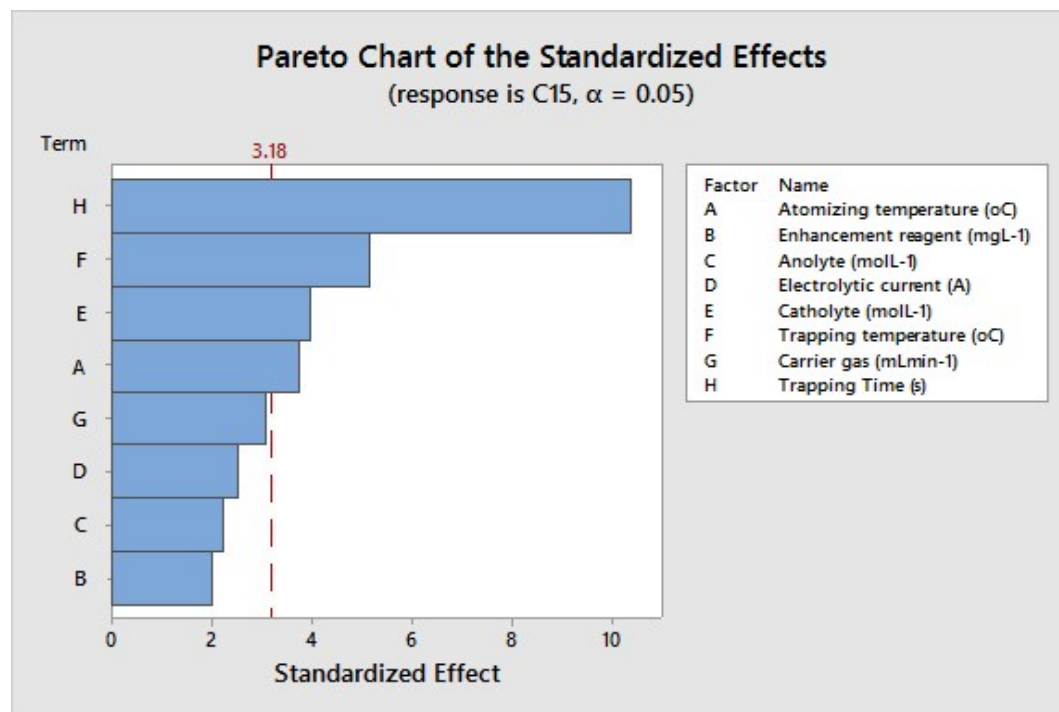

Fig. S-10†

Effects of different atomization temperatures on the absorbance peak height of palladium. (Pd(II): 50 ng L<sup>-1</sup>), Catholyte: 0.005 mol L<sup>-1</sup> sulfuric acid. All other conditions for ECVG-GFAAS were set at the optimum values.

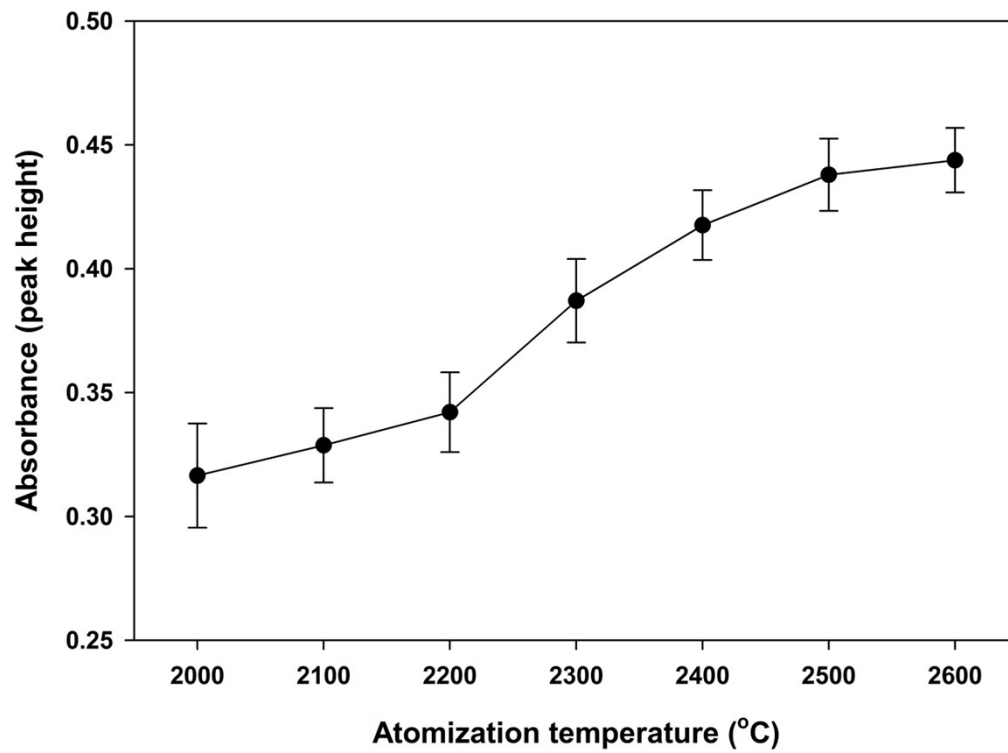

Fig. S-11†

Effects of different catholyte concentrations on the absorbance peak height of palladium (Pd(II): 50 ng L<sup>-1</sup>). All other conditions for ECVG-GFAAS were set at the optimum values.

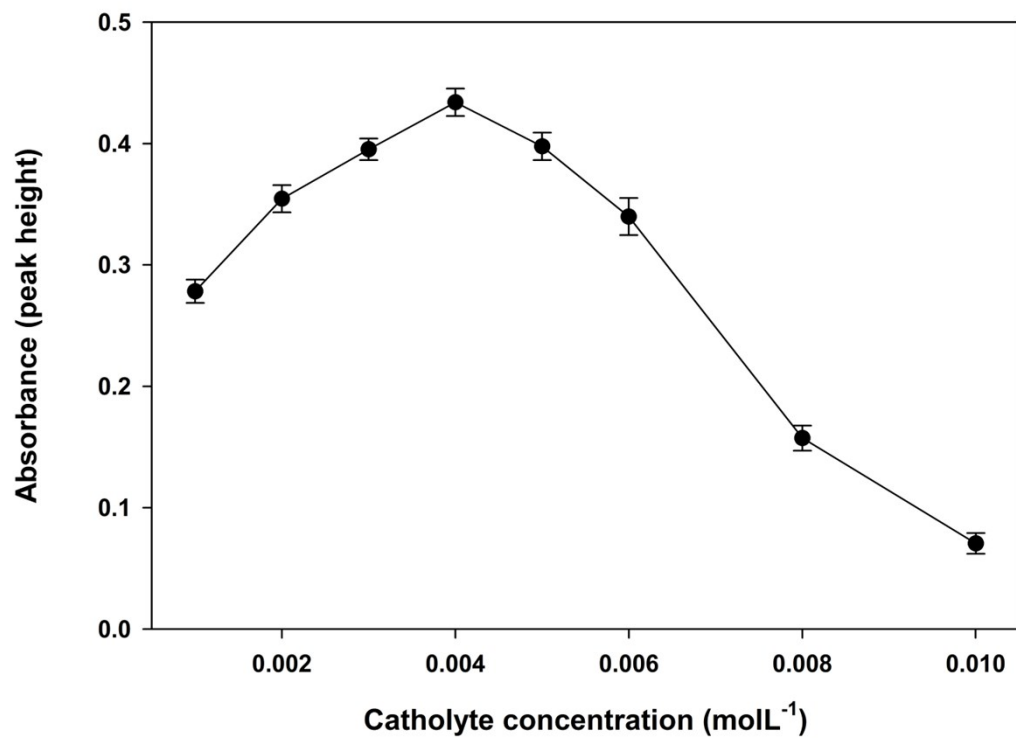

Supplement: c8ja00406d1.pdf [file c8ja00406d1.pdf]
